# Supplementary material
Source: PubMed Central journal article supplement (PMC5576932)
Supplement: ASN.2016101101SupplementaryData.pdf [file ASN.2016101101SupplementaryData.pdf]

**Supplementary Figure 1. Adjusted Associations between Plasma TNFR1 and TNFR 2 Levels and Renal Outcomes**

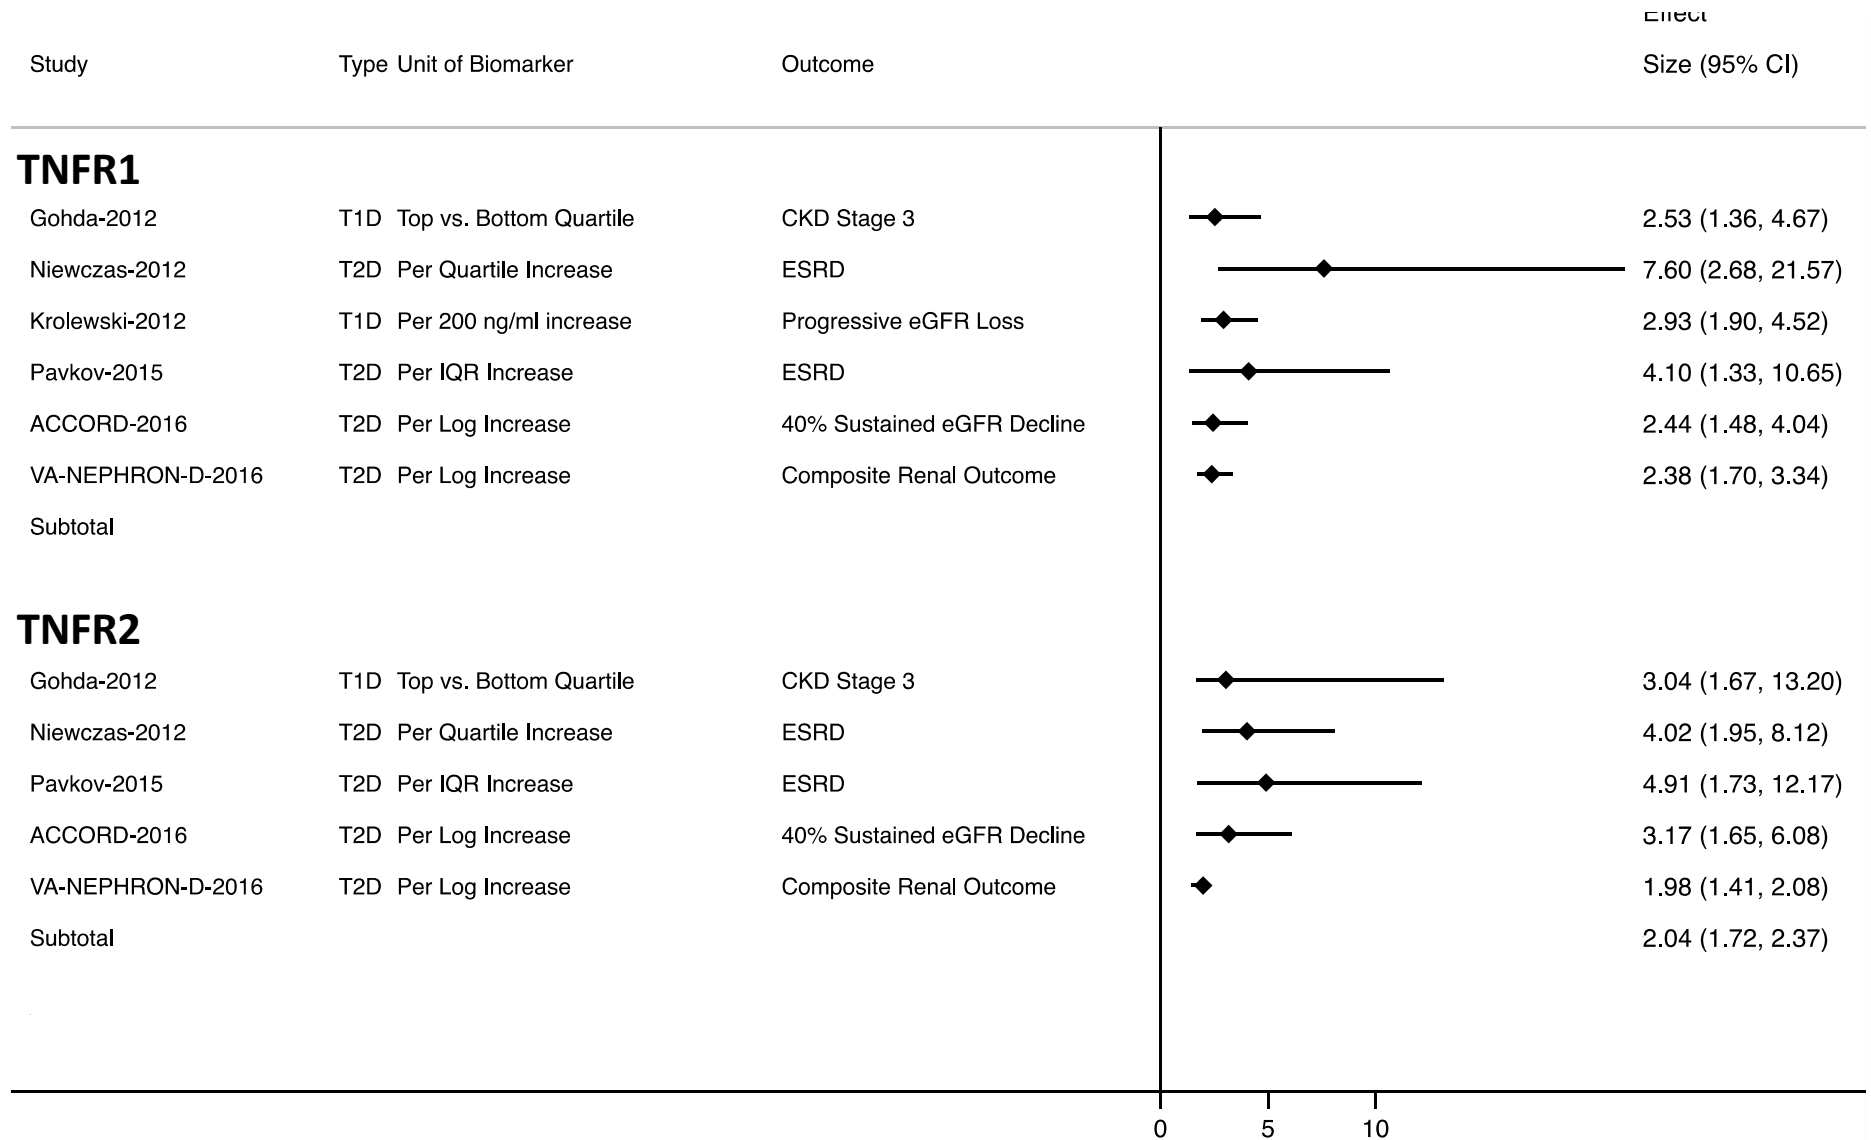

Supplementary Figure 2. Selection of Participants and Renal Endpoints in the VA NEPHRON-D Cohort

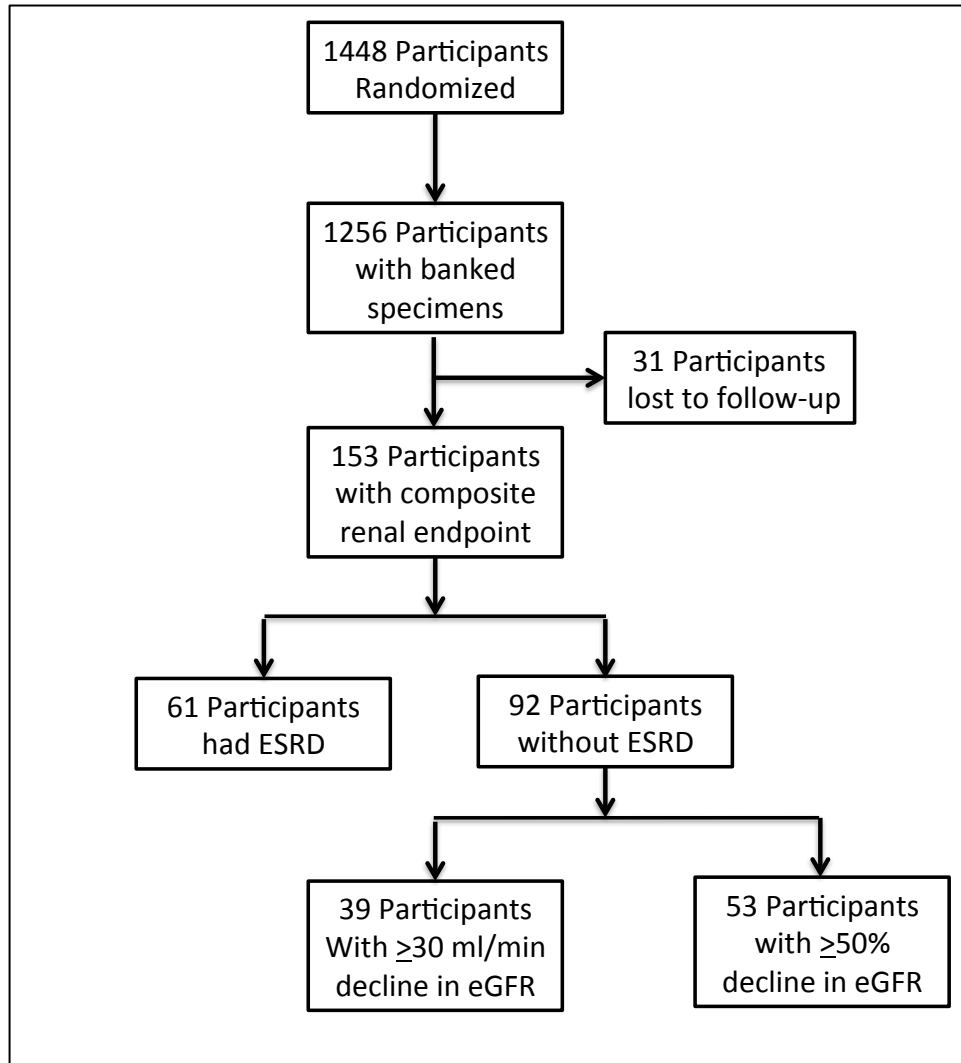

**Supplementary Table 1. ORs and 95% CIs for the Renal Endpoint by Quartiles of Plasma Biomarkers in Both Cohorts**

|                      | <b>Model 1<br/>Odds Ratio (95% CI)</b> | <b>Model 2<br/>Odds Ratio (95% CI)</b> | <b>Model 3<br/>Odds Ratio (95% CI)</b> |
|----------------------|----------------------------------------|----------------------------------------|----------------------------------------|
| <b>ACCORD</b>        |                                        |                                        |                                        |
| <b>TNFR1</b>         |                                        |                                        |                                        |
| <=1528 pg/ml         | 1 (Ref)                                | 1 (Ref)                                | 1 (Ref)                                |
| 1529 to 2043 pg/ml   | 1.36 (0.73-2.57)                       | 1.29 (0.68-2.45)                       | 1.01 (0.46-2.24)                       |
| 2044 to 2690 pg/ml   | 3.08 (1.56-6.09)                       | 3.02 (1.50-6.07)                       | 2.29 (1.02-5.17)                       |
| >=2691 pg/ml         | 4.39 (2.16-8.92)                       | 4.20 (1.99-8.87)                       | 2.99 (1.23-7.25)                       |
| <b>TNFR2</b>         |                                        |                                        |                                        |
| <=5163 pg/ml         | 1 (Ref)                                | 1 (Ref)                                | 1 (Ref)                                |
| 5164-6317 pg/ml      | 3.33 (1.61-6.87)                       | 3.54 (1.67-7.54)                       | 2.98 (1.21-7.35)                       |
| 6318-8082 pg/ml      | 6.06 (2.83-12.95)                      | 6.60 (2.99-14.56)                      | 6.48 (2.59-16.20)                      |
| >=8083 pg/ml         | 8.42 (3.70-18.71)                      | 9.05 (3.79-22.60)                      | 8.37 (3.00-23.41)                      |
| <b>KIM-1</b>         |                                        |                                        |                                        |
| <=109 pg/ml          | 1 (Ref)                                | 1 (Ref)                                | 1 (Ref)                                |
| 110-158 pg/ml        | 3.10 (1.64-5.87)                       | 3.04 (1.58-5.83)                       | 2.48 (1.16-5.31)                       |
| 159-265 pg/ml        | 3.11 (1.57-6.19)                       | 2.93 (1.45-5.94)                       | 3.07 (1.27-7.48)                       |
| >=266 pg/ml          | 6.17 (2.93-12.99)                      | 5.23 (2.42-11.30)                      | 7.52 (2.83-20.01)                      |
| <b>VA NEPHRON-D</b>  |                                        |                                        |                                        |
| <b>TNFR1</b>         |                                        |                                        |                                        |
| <=3104 pg/ml         | 1 (Ref)                                | 1 (Ref)                                | 1 (Ref)                                |
| 3105 to 4186 pg/ml   | 1.00(0.56-1.79)                        | 0.97(0.53-1.75)                        | 1.07(0.59-1.96)                        |
| 4187 to 5810 pg/ml   | 1.46(0.85-2.50)                        | 1.43(0.80-2.57)                        | 1.55(0.86-2.82)                        |
| >=5811 pg/ml         | 3.25(1.99-5.32)                        | 2.99(1.68-5.33)                        | 3.45(1.90-6.27)                        |
| <b>TNFR2</b>         |                                        |                                        |                                        |
| <=8182 pg/ml         | 1 (Ref)                                | 1 (Ref)                                | 1 (Ref)                                |
| 8183 to 10699 pg/ml  | 2.13(1.16-3.91)                        | 2.09(1.12-3.88)                        | 2.05(1.09-3.84)                        |
| 10700 to 13813 pg/ml | 2.50(1.38-4.52)                        | 2.39(1.26-4.51)                        | 2.28(1.19-4.34)                        |
| >=13814 pg/ml        | 4.46(2.54-7.84)                        | 3.88(2.06-7.32)                        | 3.80(1.99-7.26)                        |
| <b>KIM-1</b>         |                                        |                                        |                                        |
| <=235 pg/ml          | 1 (Ref)                                | 1 (Ref)                                | 1 (Ref)                                |
| 236 to 406 pg/ml     | 1.58(0.77-3.24)                        | 1.53(0.74-3.15)                        | 1.61(0.78-3.33)                        |

|                  |                  |                  |                  |
|------------------|------------------|------------------|------------------|
| 407 to 709 pg/ml | 3.51(1.84-6.70)  | 3.17(1.63-6.15)  | 3.12(1.60-6.11)  |
| >=710 pg/ml      | 7.99(4.33-14.75) | 6.85(3.56-13.15) | 6.33(3.26-12.31) |

Model 1: individual biomarker only

Model 2: Model 1 + study design: treatment arm, baseline eGFR, albuminuria

Model 3: Model 2 + age, race, SBP, DBP, medications (Fibrates/ ACE-Inhibitors/Angiotensin Receptor Blockers)

Model 4: Model 3 + all biomarkers

In ACCORD renal endpoint is defined as achieving an estimated eGFR <60 mL/min/1.73m<sup>2</sup> along with a sustained (on two or more visits  $\geq$ 3 months apart) decline in eGFR of  $\geq$  40% from baseline eGFR. In VA NEPHRON-D, renal outcome is defined as the occurrence of a decline in the eGFR (an absolute decrease of  $\geq$ 30 mL/min/1.73m<sup>2</sup> if the estimated GFR was  $\geq$ 60 mL/min/1.73m<sup>2</sup> at randomization or a relative decrease of  $\geq$ 50% if the estimated GFR was <60 mL/min/1.73m<sup>2</sup>) or ESRD (defined by the initiation of maintenance dialysis, receipt of kidney transplant, or an estimated GFR of <15 mL/min/1.73m<sup>2</sup>).
